# Supplementary material for: Impact of remote experimentation, interactivity and platform effectiveness on laboratory learning outcomes
Source: Springer Nature journal article supplement (doi:10.1186/s41239-021-00272-z), 2021-07-07
Supplement: MOESM1 [file 19342160]

## Conceptual Understanding Questionnaire (CUQ)

- Q1. The Young's modulus, in the linear stress-strain region, is...
- dependent on load
  - dependent on strain
  - constant
  - variable
- Q2. The experiment does not allow the specimen to yield because of...
- strain hardening
  - failure at yield
  - machine incapable of yield load
  - gauge inaccurate at yield
- Q3. Engineering stress differs from True stress because of...
- Nominal Initial Area
  - Necking Area
  - Failure Area
  - Yield Area
- Q4. The strain in the experiment is measured using strain gauge instrumentation because...
- strain gauge has infinite life
  - gauge installation is very easy
  - micro-strain elongation
  - gauges cheaper than encoder
- Q5. The point at which the linear stress-strain relationship ends is called...
- ultimate strength
  - yield
  - proportional limit
  - 0.2% yield
- Q6. The stress concentration due to hole is expected to be...
- same as average stress
  - 10 times average stress
  - 2.5 times average stress
  - 100 times average stress
- Q7. If the nominal stress for ductile material reaches the failure limit, the stress concentration factor is...
- Eliminated
  - Doubled
  - Exponential
  - Halved

- Q8. Stress Concentration around a Notch experiment is an example of...
- Average loading
  - Mode 1 loading
  - Model 3 loading
  - Torsional loading
- Q9. What is the notch stress to average stress ratio?
- 1000
  - 100
  - 50
  - 2 – 4
- Q10. The notch tip Stress intensity factor is a function of...
- equal to crack length
  - square of crack length
  - log of crack length
  - square root of crack length
- Q11. In Saint Venant's Principle a typical ratio of the concentrated stress to the nominal would be...
- 1
  - 2.7
  - 4
  - 10
- Q12. Saint Venant's Principle predicts near the load application point...
- a higher stress than nominal
  - a lower stress than nominal
  - same stress as nominal
  - yield stress value
- Q13. The negative lateral strain corresponds to...
- compression in lateral direction
  - compression in longitudinal direction
  - stress concentration
  - yield phenomena
- Q14. The shear modulus is a function of the Poisson's ratio and the...
- Flexural Rigidity
  - Young's Modulus
  - Specimen length
  - Yield Stress
