# Supplementary material for: Impact of remote experimentation, interactivity and platform effectiveness on laboratory learning outcomes
Source: Springer Nature journal article supplement (doi:10.1186/s41239-021-00272-z), 2021-07-07
Supplement: MOESM2 [file 19342160]

## Effectiveness Survey Instrument

| RT-UTM                                                                                                                  | PL-UTM                                                                                                                            |
|-------------------------------------------------------------------------------------------------------------------------|-----------------------------------------------------------------------------------------------------------------------------------|
| Comprehension without supervision                                                                                       |                                                                                                                                   |
| I know how to measure the strain in order to determine the Young's modulus in RT UTM.                                   | I know how to measure the strain in order to determine the Young's modulus in PL UTM.                                             |
| Using the zoomed-in animation, I am able to comprehend the specimen elongation                                          | In PL-UTM, I am able to comprehend specimen elongation.                                                                           |
| I know that the compression or tension of the same specimen can help me determine Young's modulus.                      | I know that the compression or tension of the same specimen can help me determine Young's modulus.                                |
| Well defined procedure                                                                                                  |                                                                                                                                   |
| Experiment procedure provided in the RT-UTM gives me a good idea about carrying out the experiment.                     | Experiment procedure provided in the PL-UTM gives me a good idea about carrying out the experiment.                               |
| Even though the specimen comes preloaded in the RT-UTM experimental setup, I am able to comprehend the loading process. | Even though the instructor loads the specimen and demonstrates the experiment in PL, I am able to comprehend the loading process. |
| I am able to get a proper understanding of the experimental calculations involved in the UTM experiments.               | I am able to get a proper understanding of the experimental calculations involved in the UTM experiments.                         |
| User Interactivity                                                                                                      |                                                                                                                                   |
| I am able to interact with RT instrument much more than what I do in the physical lab (PL).                             | I am able to interact with UTM instruments in PL effectively.                                                                     |
| RT-UTM allows me to take control over the instrument to a greater extent than I do in PL.                               | PL-UTM allows me to take control over the instrument to a greater extent.                                                         |
| Learning of experiments through RT-UTM was fun, engaging and effective                                                  | Learning of experiments through PL-UTM was fun, engaging and effective.                                                           |
| User Convenience                                                                                                        |                                                                                                                                   |
| I find RT-Virtual Lab (RT-UTM) easy to access.                                                                          | I find PL-UTM easy to access.                                                                                                     |
| The contents of RT-UTM are well organised and easy to navigate.                                                         | The contents of PL-UTM are well organized and easy to follow.                                                                     |

|                                                                                             |                                                                                                 |
|---------------------------------------------------------------------------------------------|-------------------------------------------------------------------------------------------------|
| I can repeat the experiments at my convenience in RT-UTM.                                   | I can repeat the experiments at my convenience in PL-UTM.                                       |
| Impact on Learning                                                                          |                                                                                                 |
| I am able to get a proper understanding of the experiment in RT-UTM.                        | I am able to get a proper understanding of the experiment in PL-UTM.                            |
| Performing experiment in RT-UTM increases my confidence level for performing the same in PL | Performing experiments in PL-UTM increases my confidence level for unsupervised experimentation |
| RT-UTM has helped improve my performance in PL                                              | PL-UTM has helped me to improve my performance in the laboratory.                               |
